# Supplementary material for: Towards compartmentalized photocatalysis: multihaem proteins as transmembrane molecular electron conduits
Source: Royal Society of Chemistry journal article supplement (doi:10.1039/c8fd00163d), 2018-12-21
Supplement: c8fd00163d1.pdf [file c8fd00163d1.pdf]

## Supplementary Information

### Towards Compartmentalized Photocatalysis: Multiheme Proteins as Transmembrane Molecular Electron Conduits

**Authors:** Anna Stikane<sup>1,2</sup>, Ee Taek Hwang<sup>1,2</sup>, Emma V. Ainsworth<sup>3</sup>, Samuel Piper<sup>3</sup>, Kevin Critchley<sup>2,4</sup>, Julea N. Butt<sup>\*,3</sup>, Erwin Reisner<sup>\*,5</sup>, Lars J. C. Jeuken<sup>\*,1,2</sup>

**Affiliations:**

1. School of Biomedical Sciences, University of Leeds, LS2 9JT, UK
2. The Astbury Centre for Structural Molecular Biology, University of Leeds, LS2 9JT, UK
3. Centre for Molecular and Structural Biochemistry, School of Chemistry and School of Biological Sciences, University of East Anglia, Norwich, NR4 7TJ, UK
4. School of Physics and Astronomy, University of Leeds, LS2 9JT, UK
5. Department of Chemistry, University of Cambridge, Cambridge, Lensfield Road, CB2 1EW, UK

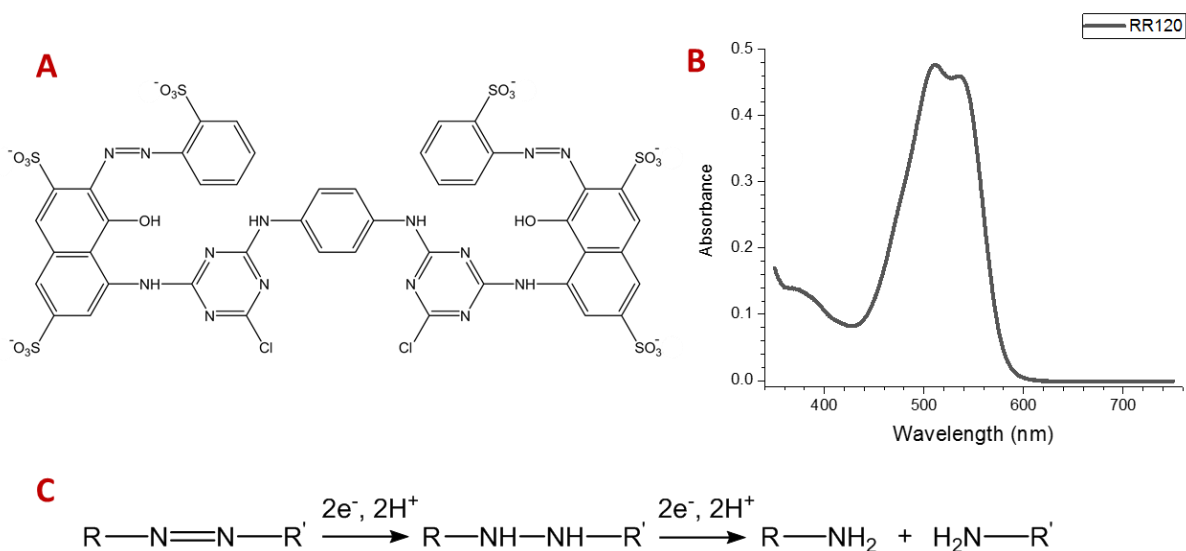

*Figure S1* The chemical structure (a) and absorbance spectrum of 15  $\mu\text{M}$  RR120 (b). Buffer: 20 mM MOPS, 30 mM  $\text{Na}_2\text{SO}_4$ , pH 7.4. (c) Reduction reaction of azo groups.

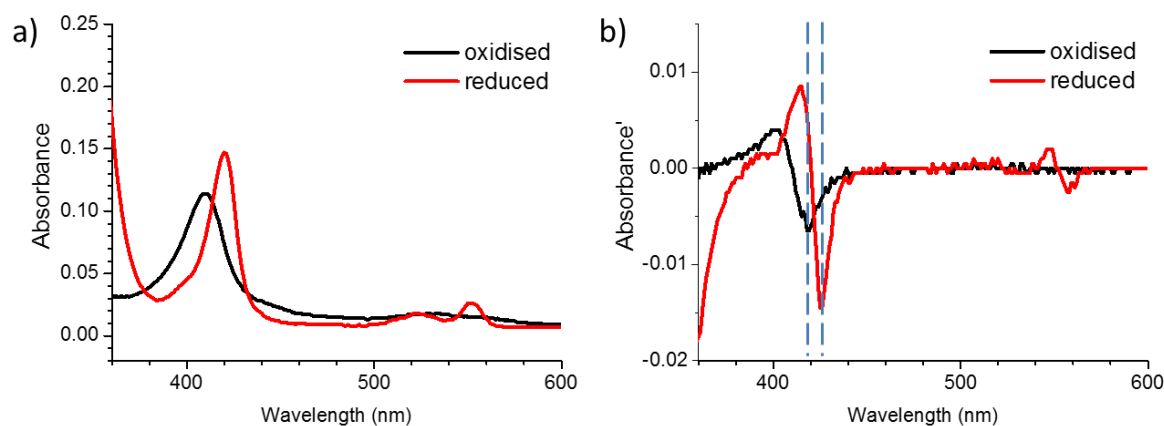

Figure S2 MtrCAB absorbance (a) and the 1st derivative of MtrCAB absorbance (b). Black – oxidised MtrCAB, Red – MtrCAB reduced by dithionite. Dashed lines indicate wavelengths selected to assess haem reduction in Figure S4 by calculating the difference between them (i.e.,  $\Delta A' = A'_{418} - A'_{426}$ ). In this case  $\Delta A'$  is -0.0035 and 0.02 for oxidised and reduced MtrCAB, respectively.

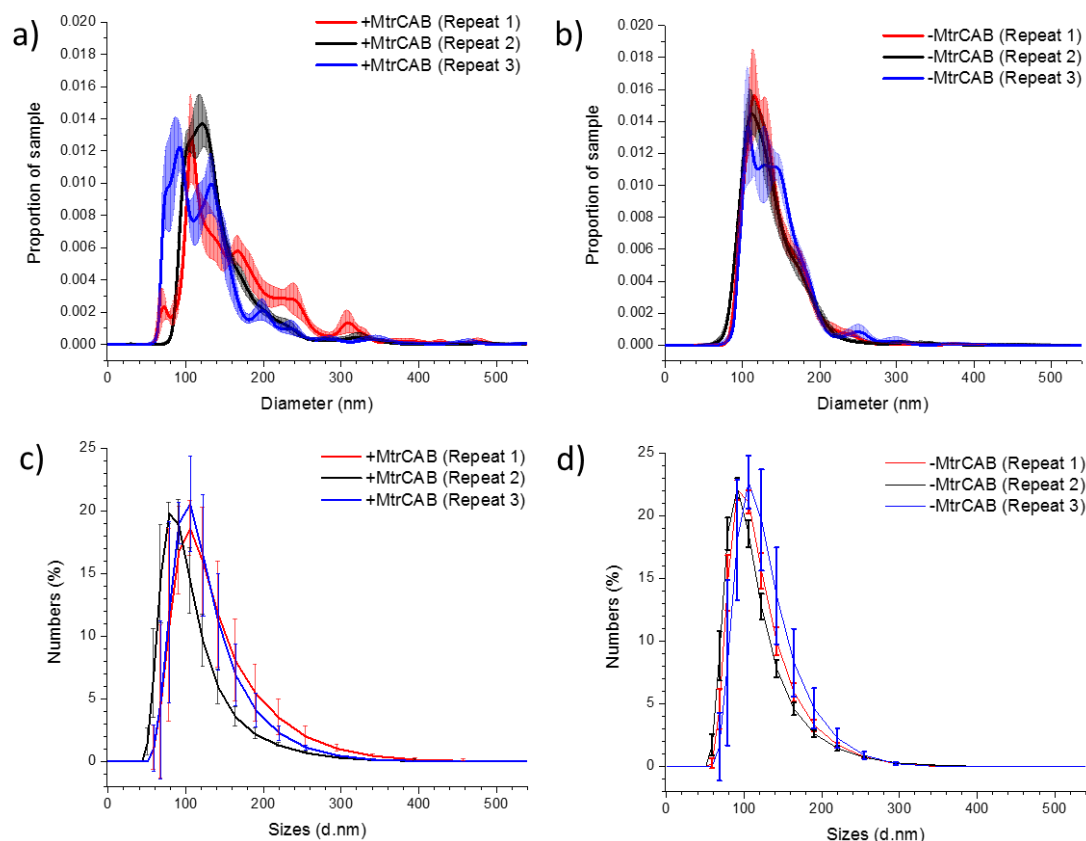

Figure S3 Size distribution of liposomes with and without MtrCAB (a, c and b, d, respectively) determined from nanoparticle tracking analysis (NTA) (a, b) and dynamic light scattering (DLS) (c, d). Shaded area in NTA data represents the standard error, whereas the error bars in DLS represent the standard deviation ( $n=3$ ). Bin size for NTA is 0.5 nm. Repeats 1 - 3 represent liposomes from three separate preparations.

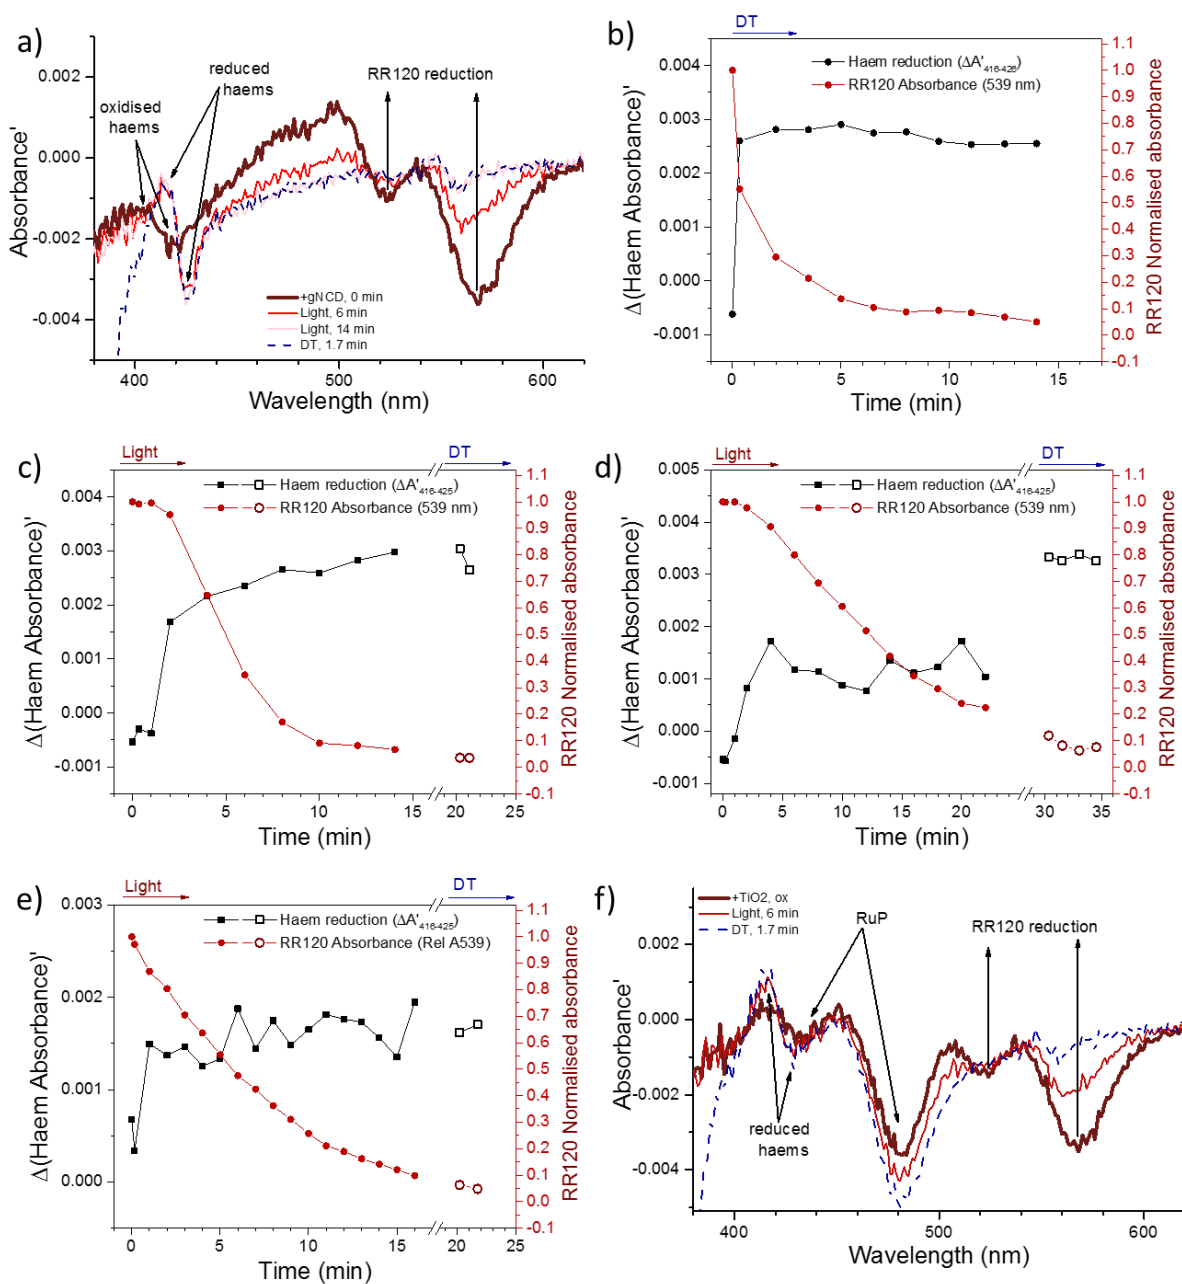

**Figure S4** Reduction of MtrCAB haems and RR120 by DT (**b**), *g*-N-CD (**c**), *a*-CD (**d**) and RuP-TiO<sub>2</sub> (**e**). (**a**) Example of the 1st derivative taken of the absorbance spectra ( $A'$ ) from *g*-N-CDs photoreduction of MtrCAB proteoliposomes containing RR120. Oxidised and reduced haems have different signatures, and the haem reduction is estimated by calculating the  $A'$  difference at the wavelengths corresponding the oxidised and reduced haem minima (416 nm and 426 nm, respectively; see Figure S2). At the start of the experiment MtrCAB is oxidised (dark red line) and gets reduced during illumination (lighter lines); Dashed line – reduced sample after addition of DT. (**b - e**) Photoreduction of MtrCAB haems as observed by changes in the 1st derivative of haem absorbance (scale on the left, black) and photoreduction of RR120 encapsulated in MtrCAB proteoliposomes (scale on the right, red). Time indicates duration of total illumination. DT – dithionite is included as indicator of fully reduced haems. (**f**) Example of the 1st derivative taken of the absorbance spectra from RuP-TiO<sub>2</sub> photoreduction of MtrCAB proteoliposomes containing RR120. Although, RuP absorbance masks the signal of oxidised and reduced haems, the haem reduction was still estimated by calculating the  $A'$  difference at 416 nm and 426 nm.

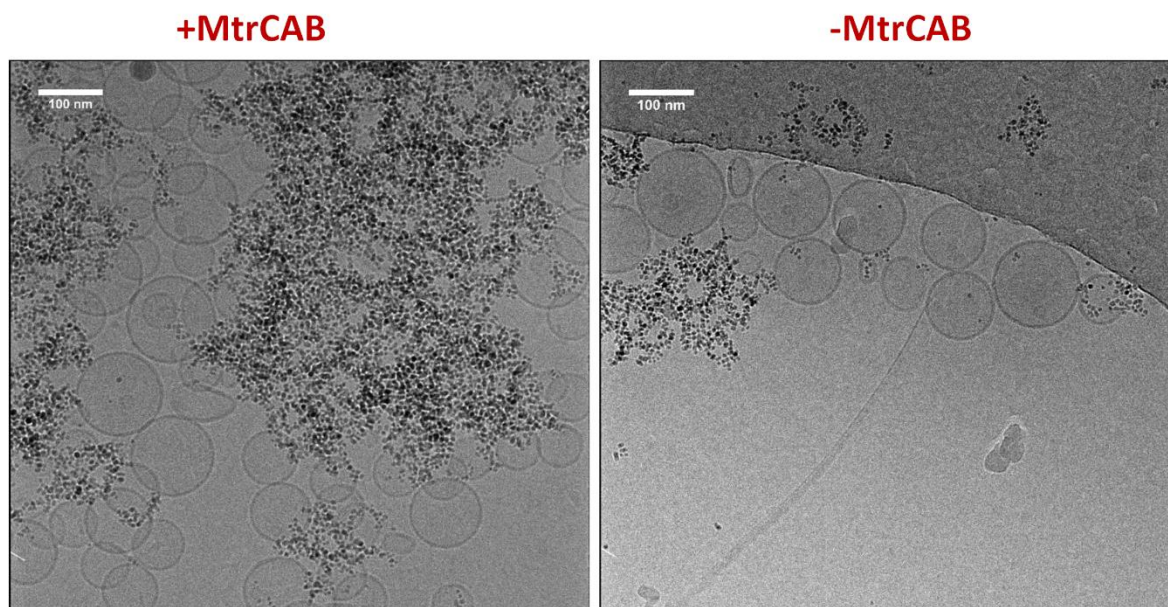

Figure S5 Cryo-EM of E.coli liposomes with and without reconstituted MtrCAB mixed with **RuP**-TiO<sub>2</sub> NPs. **RuP**-TiO<sub>2</sub> agglomerates formed within 2-5 min after transfer from water to liposome sample.

## Supplementary Materials and Methods

### Cryo-Electron Microscopy (cryo-EM)

Liposome or **RuP**-TiO<sub>2</sub> sample or a sample containing both was placed onto lacey carbon grids with 200 $\mu$ m mesh (Agar Scientific), blotted, and plunged frozen into liquid ethane. Cryo-EM was performed as described elsewhere.<sup>1</sup> In short, cryo-EM was carried out at liquid nitrogen temperatures using an Oxford CT3500 holder and a FEI Tecnai-F20 electron microscope. Images were recorded at 50,000 $\times$  magnification on a Gatan US4000 CCD camera under low-dose conditions ( $\sim 20$  e<sup>-</sup>/Å<sup>2</sup>).

### Observations of haem reduction state by spectroscopy (Soret band)

Observation of haem absorbance Soret peak is hindered by high background absorbance caused by absorbance and scattering of all three LHNPs and liposomes themselves. Haem difference spectra could not be used due to spectral overlap with changes in RR120 and DT absorbance. As the result, the first derivatives of all spectra were calculated. This allowed to observe different signatures of oxidised and reduced MtrCAB (Figure S2). The haem reduction was then estimated by calculating the A' difference at the wavelengths corresponding the oxidised and reduced haem minima (416 nm and 426 nm, respectively; Figure S2 and S4).

## References

- 1 K. C. Dent, R. Thompson, A. M. Barker, J. A. Hiscox, J. N. Barr, P. G. Stockley and N. A. Ranson, *Structure*, 2013, **21**, 1225–1234.
